# Supplementary material for: From quencher to potent activator – Multimodal luminescence thermometry with Fe3+ in the oxides MAl4O7 (M = Ca, Sr, Ba)
Source: Royal Society of Chemistry journal article supplement (doi:10.1039/d1tc01272j), 2021-01-01
Supplement: d1tc01272j1.pdf [file d1tc01272j1.pdf]

## Supporting Information

### **From quencher to potent activator – Multimodal luminescence thermometry with Fe<sup>3+</sup> in the oxides MAI<sub>4</sub>O<sub>7</sub> (M = Ca, Sr, Ba)**

**K. Kniec<sup>1</sup>, W. Piotrowski<sup>1</sup>, K. Ledwa<sup>1</sup>, M. Suta<sup>2\*</sup>, L. D. Carlos<sup>3</sup>, L. Marciniak<sup>1\*</sup>**

<sup>1</sup>Institute of Low Temperature and Structure Research, Polish Academy of Sciences, Okólna 2, 50-422 Wrocław, Poland

<sup>2</sup>Condensed Matter & Interfaces, Debye Institute for Nanomaterials Science, Utrecht University, Princetonplein 1, 3584 CC  
Utrecht, The Netherlands

<sup>3</sup>Phantom-g, CICECO-Aveiro Institute of Materials, Department of Physics, University of Aveiro, Campus de Santiago,  
3810-193 Aveiro, Portugal

\* corresponding authors: [m.suta@uu.nl](mailto:m.suta@uu.nl), [l.marciniak@intibs.pl](mailto:l.marciniak@intibs.pl)

*KEYWORDS: iron, terbium, luminescence, luminescent thermometry, aluminates, lifetime, ratiometric,  
sensitivity*

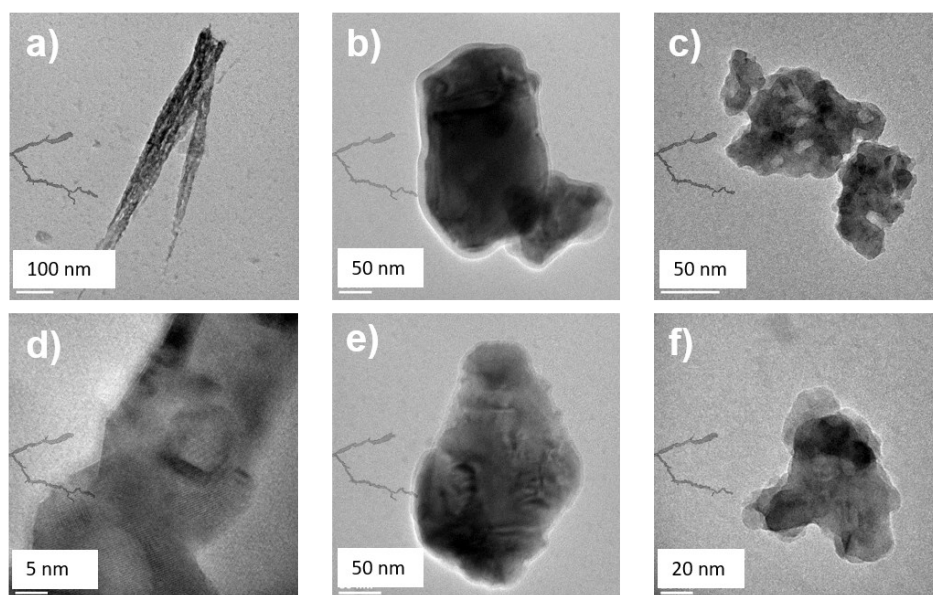

**Figure S1.** Representative TEM images of BAO – a, d), SAO – b, e) and CAO – c, f).

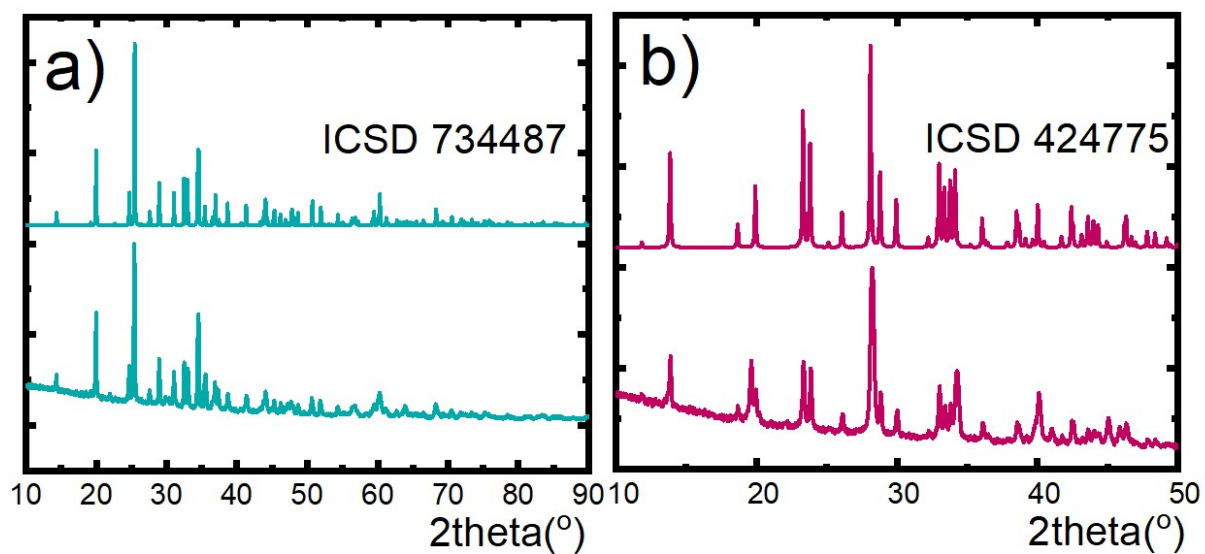

**Figure S2.** XRD patterns of  $\text{Fe}^{3+}$ ,  $\text{Tb}^{3+}$ -co-doped CAO and BAO –a) and –b), respectively.

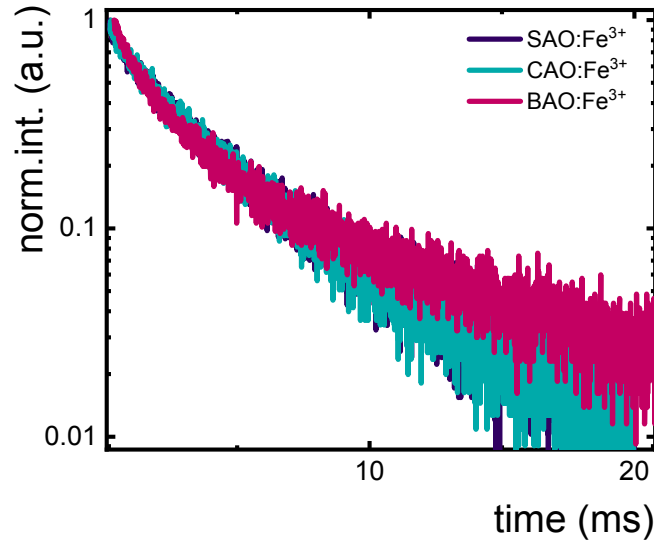

**Figure S3.** The decay profiles of Fe<sup>3+</sup> luminescence in different host materials (at 123 K).

Eq. S1. The double-exponential function for calculation of the average luminescence lifetime.

$$y = y_0 + A_1 \cdot \exp\left(-\frac{x}{t_1}\right) + A_2 \cdot \exp\left(-\frac{x}{t_2}\right) \quad (\text{Eq. S1})$$

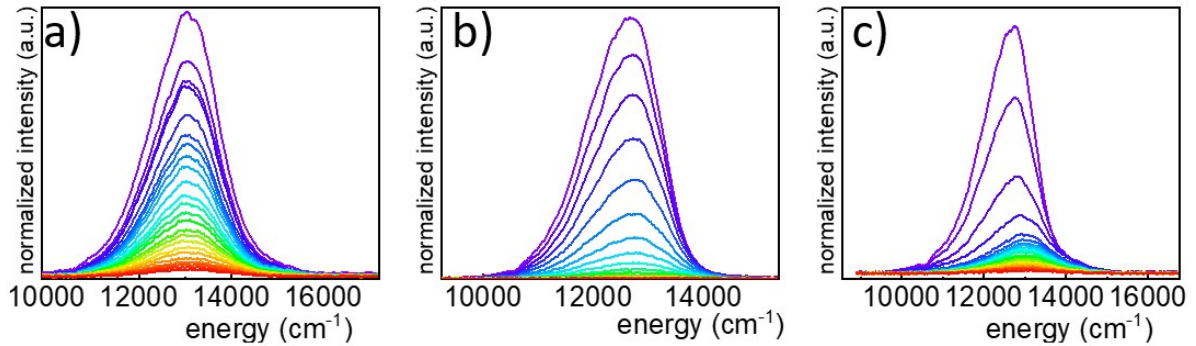

**Figure S4.** The thermal evolution of the emission spectra of SAO:Fe<sup>3+</sup>-a), CAO:Fe<sup>3+</sup>-b) and BAO:Fe<sup>3+</sup>-c).

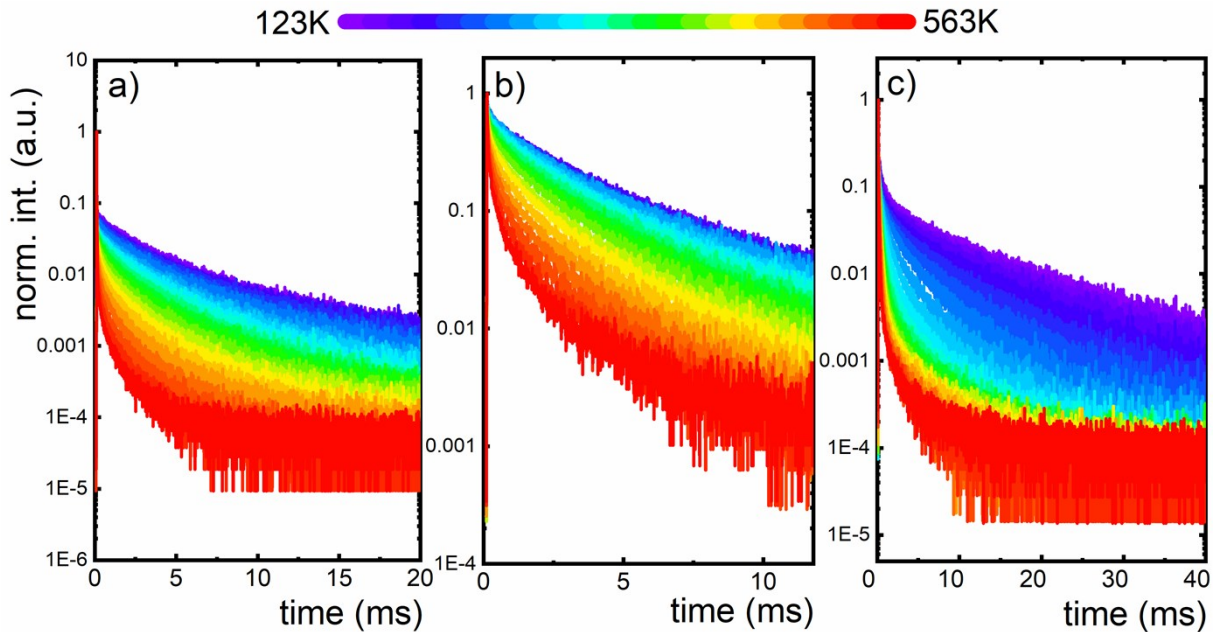

**Figure S5.** The thermal evolution of the luminescence decay profiles of SAO:Fe<sup>3+</sup>-a), CAO:Fe<sup>3+</sup>-b) and BAO:Fe<sup>3+</sup>-c).

The relative precision of temperature determination ( $\sigma_T/T$ ) using CAO:Fe<sup>3+</sup>, Tb<sup>3+</sup> and BAO:Fe<sup>3+</sup>, Tb<sup>3+</sup> was determined as follows:

$$\frac{\sigma_T}{T} = \pm \frac{1}{TS_r} \frac{dLIR}{LIR} \quad (\text{eq. S2})$$

where:

$$\frac{dLIR}{LIR} \sim \sqrt{\frac{1}{I_{Tb}} + \frac{1}{I_{Fe}}} \quad (\text{eq. S3})$$

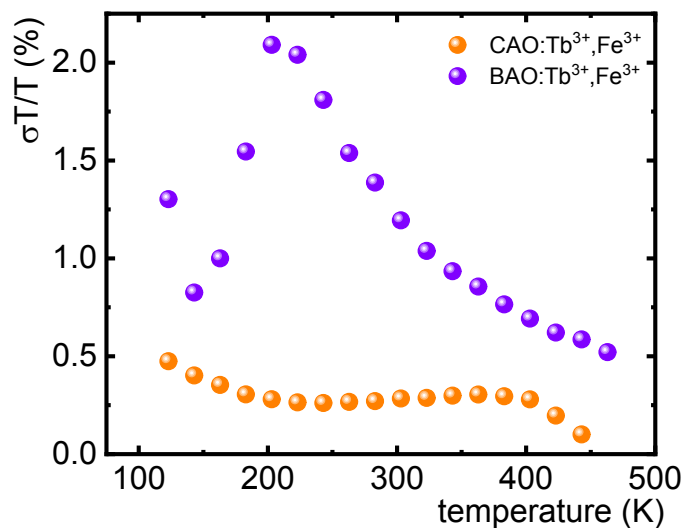

**Figure S6.** The thermal evolution of the relative temperature precision of CAO:Fe<sup>3+</sup>, Tb<sup>3+</sup> and BAO:Fe<sup>3+</sup>, Tb<sup>3+</sup>
